# Supplementary material for: Demonstrating the Applicability of Smartwatches in PM2.5 Health Impact Assessment
Source: MDPI journal article supplement (doi:10.3390/s21134585), 2021-07-04
Supplement: s1 [file s1]

## Article

# Demonstrating the Applicability of Smartwatches in PM<sub>2.5</sub> Health Impact Assessment

Ming-Chien Mark Tsou <sup>1</sup>, Shih-Chun Candice Lung <sup>1,2,3,\*</sup> and Chih-Hui Cheng <sup>1</sup>

<sup>1</sup> Research Center for Environmental Changes, Academia Sinica, Taipei 115, Taiwan; marktsou09@gate.sinica.edu.tw (M.-C.M.T.); chihhui104@gate.sinica.edu.tw (C.-H.C.)

<sup>2</sup> Department of Atmospheric Sciences, National Taiwan University, Taipei 106, Taiwan

<sup>3</sup> Institute of Environmental and Occupational Health Sciences, National Taiwan University, Taipei 100, Taiwan

\* Correspondence: sclung@rcec.sinica.edu.tw; Tel.: +886-2-27875908; Fax: 886-2-27833584

## Supplementary Figure Legend

Supplementary Figure S1. The activity intensity measurements obtained from AS-LUNG-P during sleeping periods. The dash line indicates 1100 mG.

Supplementary Figure S2. The correction equation for converting the activity intensity measurements obtained from AS-LUNG-P to RootiRx-comparable measurements, after excluding data below 1100 mG.

**Citation:** Tsou, M.-C.M.; Lung, S.-C.C.; Cheng, C.-H. Demonstrating the Applicability of Smartwatches in PM<sub>2.5</sub> Health Impact Assessment. *Sensors* **2021**, *21*, 4585. <https://doi.org/10.3390/s21134585>

Academic Editor(s):

Received: 15 May 2021

Accepted: 30 June 2021

Published: 4 July 2021

**Publisher's Note:** MDPI stays neutral with regard to jurisdictional claims in published maps and institutional affiliations.

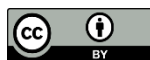

**Copyright:** © 2021 by the authors. Licensee MDPI, Basel, Switzerland. This article is an open access article distributed under the terms and conditions of the Creative Commons Attribution (CC BY) license (<http://creativecommons.org/licenses/by/4.0/>).

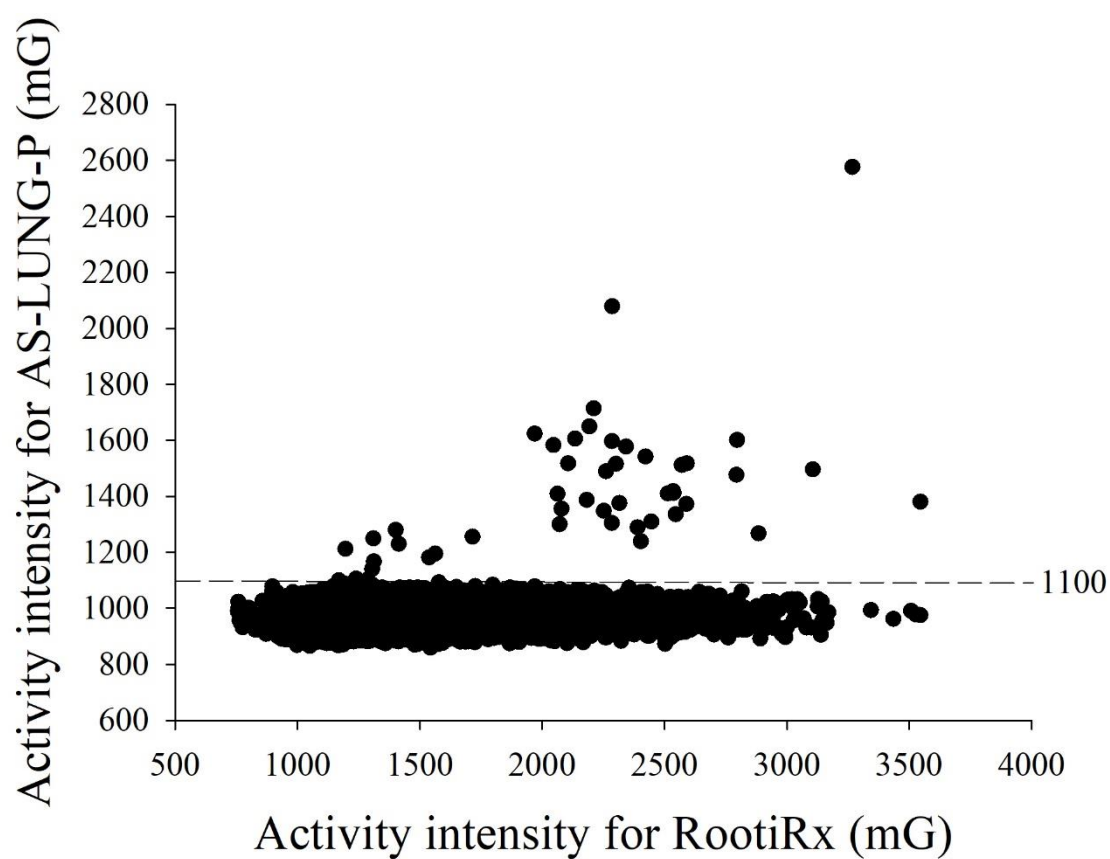

**Figure S1.** The activity intensity measurements obtained from AS-LUNG-P during sleeping periods. The dash line indicates 1100 mG.

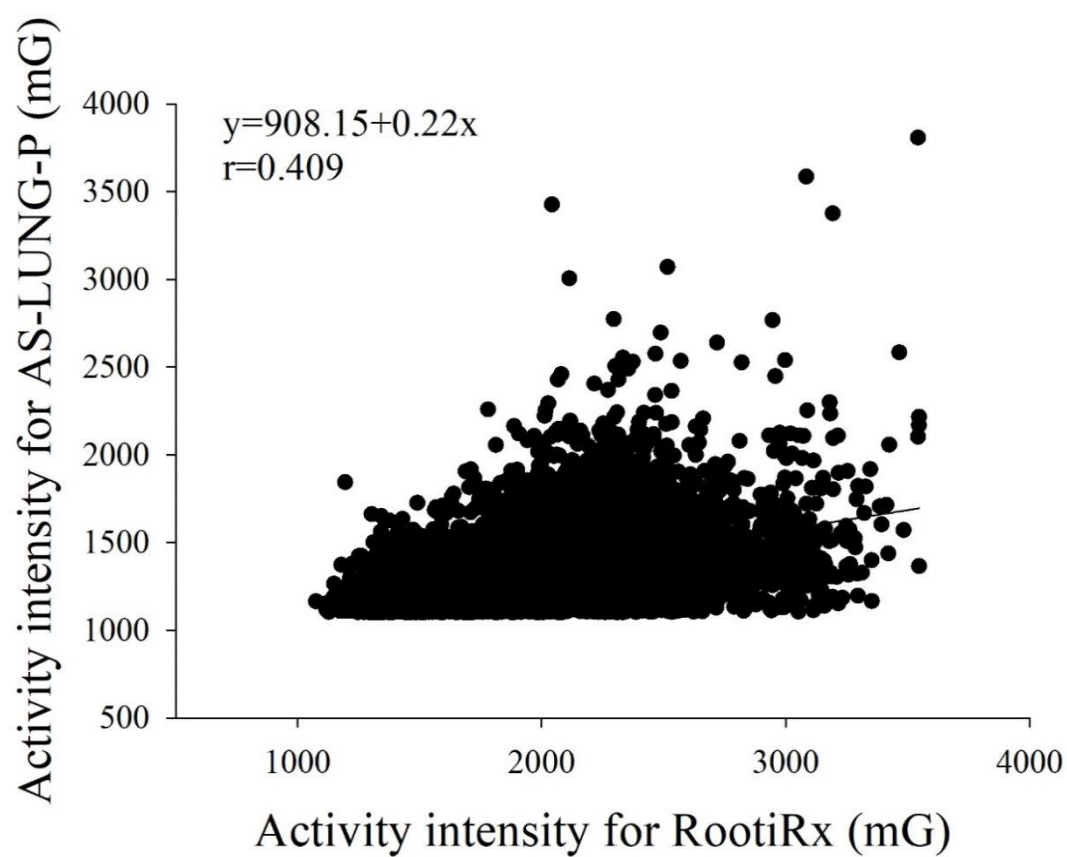

**Figure S2.** The correction equation for converting the activity intensity measurements obtained from AS-LUNG-P to RootiRx-comparable measurements, after excluding data below 1100 mG.
